# Supplementary material for: What Does a KAP Survey Reveal about the Awareness Regarding Leishmaniasis among the Community of an Endemic Area in Sri Lanka?
Source: MDPI journal article supplement (doi:10.3390/tropicalmed9030055), 2024-02-28
Supplement: s1 [file s1]

| item no. | Item description                                                                    |
|----------|-------------------------------------------------------------------------------------|
| 1        | Do you know about the Leishmaniasis Disease?                                        |
| 2        | Do you have any idea about the symptoms of the Leishmaniasis disease?               |
| 2a       | Symptom 1 - Wounds                                                                  |
| 2b       | Symptom 2 - Blister of pus                                                          |
| 2c       | Symptom 3 - Itching                                                                 |
| 2d       | Symptom 4 - Indelible Scars                                                         |
| 2e       | Symptom 5 - Eczema                                                                  |
| 2f       | Symptom 6 - All above                                                               |
| 2g       | Symptom 7 - Other                                                                   |
| 3        | Do you have any idea about the Leishmaniasis disease?                               |
| 4        | Who is the vector of the disease?                                                   |
| 5        | Do you know the control measures of the vectors transmitting leishmaniasis disease? |
| 6        | Is sandfly only bite in humans?                                                     |
| 7        | Do you have any idea about other biting animals?                                    |
| 7a       | Domestic Animals                                                                    |
| 7b       | Stray Animals                                                                       |
| 7c       | Wild Animals                                                                        |
| 7d       | Birds                                                                               |
| 7e       | Other                                                                               |
| 8        | Do you have an idea about breeding places?                                          |
| 8a       | Cultivated Lands                                                                    |
| 8b       | Non-Plastered houses                                                                |
| 8c       | Animal Pens                                                                         |
| 8d       | Other                                                                               |
| 8e       | All above                                                                           |
| 10       | According to your knowledge, which part of her body does this animal bite?          |
| 10a      | Do you know the biting Period?                                                      |
| 10b      | Morning                                                                             |
| 10c      | in the afternoon                                                                    |
| 10d      | Evening                                                                             |
| 10e      | Night                                                                               |
| 10f      | All above                                                                           |
| 11       | Do you know the control measures?                                                   |
| 11a      | Destroy Breeding Places                                                             |
| 11b      | Clean/Remove Breeding Places                                                        |
| 11c      | Check Everyday                                                                      |
| 11d      | Aware of the vector                                                                 |
| 11e      | Other                                                                               |
| 11f      | All above                                                                           |
| 12       | Do you/your family members follow these methods?                                    |
| 13       | Do your community members follow these methods?                                     |
| 14       | What are the problems do you have to face when reducing the breeding place?         |

|           |                                                                                           |
|-----------|-------------------------------------------------------------------------------------------|
| 15        | What are the steps to be taken in relation to someone suffering from this disease?        |
| 16        | Do you/your family members follow these methods?                                          |
| 17        | Do your community members follow these methods?                                           |
| 18        | Do you have an idea about knowledge dissemination?                                        |
| <b>19</b> | Government and Private agencies                                                           |
| <b>20</b> | Media                                                                                     |
| 21        | Community                                                                                 |
| 22        | Are you satisfied with the knowledge of you about the disease and the vector?             |
| 23        | Are you satisfied with the knowledge of your Family members about the disease and vector? |
| 24        | Government Agencies                                                                       |
| 25        | Private Agencies                                                                          |
| 26        | Community Members                                                                         |
| 27        | Family Members                                                                            |
| 28        | You                                                                                       |
| <b>29</b> | All above                                                                                 |
| <b>30</b> | Other                                                                                     |
